# Supplementary material for: Comprehensive Metabolite Identification of Genipin in Rats Using Ultra-High-Performance Liquid Chromatography Coupled with High Resolution Mass Spectrometry
Source: MDPI journal article supplement (doi:10.3390/molecules28176307), 2023-08-29
Supplement: s1 [file s1]

# Comprehensive Metabolite Identification of Genipin in Rats Using Ultra-High-Performance Liquid Chromatography Coupled with High Resolution Mass Spectrometry

Zhifeng Cui <sup>1,2,†</sup>, Zhe Li <sup>3,†</sup>, Weichao Dong <sup>3,†</sup>, Lili Qiu <sup>4</sup>, Jiayu Zhang <sup>1,\*</sup> and Shaoping Wang <sup>1,\*</sup>

Supplementary Figure S1. Identification diagram of genipin metabolites.

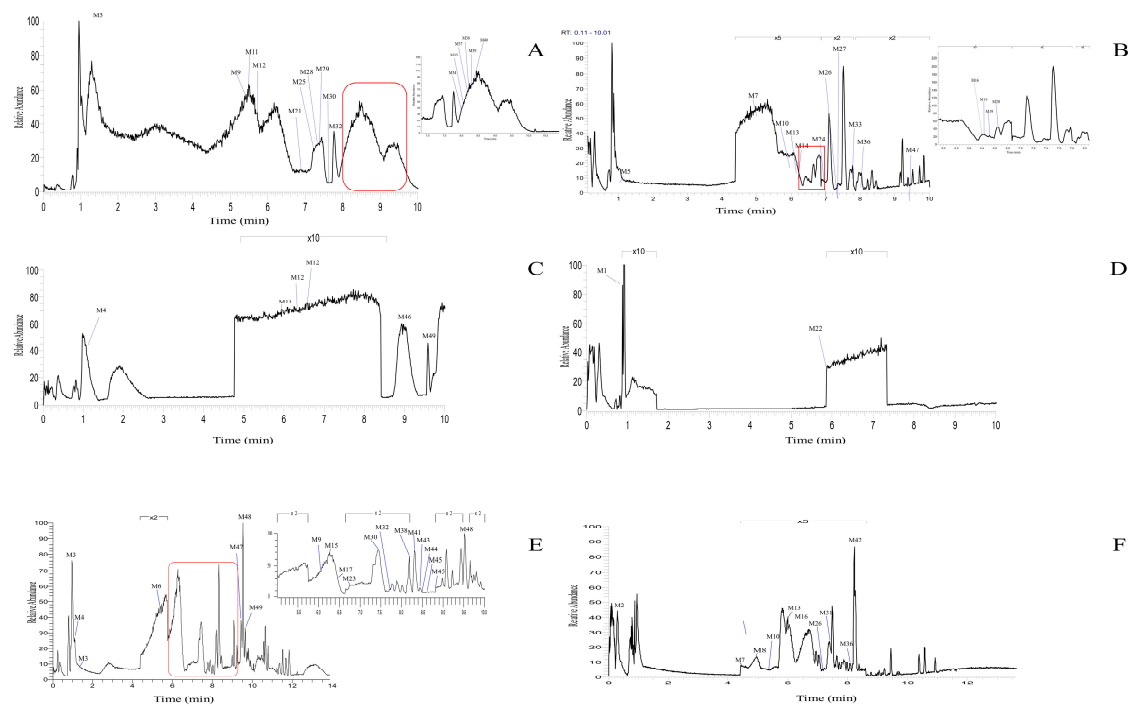

Supplementary Table S1. Classification of metabolites in fecal fermentation.

| Metabolites | 0h | 12h | 24h | 36h | 48h | 60h |
|-------------|----|-----|-----|-----|-----|-----|
| M0          | √  | √   | √   | √   | √   | √   |
| M1          | √  | √   | √   | √   | √   | √   |
| M2          | ×  | √   | √   | √   | √   | √   |
| M3          | ×  | ×   | ×   | ×   | ×   | ×   |
| M4          | √  | √   | √   | √   | √   | √   |

|     |   |   |   |   |   |   |
|-----|---|---|---|---|---|---|
| M5  | × | √ | √ | √ | √ | × |
| M6  | × | √ | √ | √ | √ | × |
| M7  | × | √ | √ | √ | √ | √ |
| M8  | × | √ | √ | √ | √ | √ |
| M9  | × | × | × | × | × | × |
| M10 | × | √ | √ | √ | √ | √ |
| M11 | × | × | × | × | × | × |
| M12 | × | × | × | × | × | × |
| M13 | × | √ | √ | √ | √ | √ |
| M14 | × | √ | √ | √ | √ | × |
| M15 | × | √ | √ | √ | √ | × |
| M16 | × | √ | √ | √ | √ | × |
| M17 | × | √ | √ | √ | √ | √ |
| M18 | × | √ | √ | √ | √ | √ |
| M19 | × | √ | √ | √ | √ | √ |
| M20 | × | √ | √ | √ | √ | √ |
| M21 | × | √ | √ | √ | √ | × |
| M22 | × | √ | √ | √ | √ | √ |
| M23 | × | √ | √ | √ | √ | √ |
| M24 | × | √ | √ | √ | √ | √ |
| M25 | × | √ | √ | √ | √ | √ |
| M26 | × | √ | √ | √ | √ | √ |
| M27 | × | × | × | × | √ | × |
| M28 | × | √ | √ | √ | √ | √ |
| M29 | × | √ | √ | √ | √ | √ |
| M30 | × | √ | √ | √ | √ | √ |
| M31 | × | √ | √ | √ | √ | × |
| M32 | × | √ | √ | √ | √ | √ |
| M33 | × | √ | √ | √ | √ | × |

|            |   |   |   |   |   |   |
|------------|---|---|---|---|---|---|
| <b>M34</b> | × | √ | √ | √ | √ | √ |
| <b>M35</b> | × | √ | √ | √ | √ | √ |
| <b>M36</b> | × | √ | √ | √ | √ | √ |
| <b>M37</b> | × | √ | √ | √ | √ | √ |
| <b>M38</b> | × | × | √ | √ | √ | √ |
| <b>M39</b> | × | √ | √ | √ | √ | √ |
| <b>M40</b> | × | √ | √ | √ | √ | × |
| <b>M41</b> | × | √ | √ | √ | √ | √ |
| <b>M42</b> | × | √ | √ | √ | √ | √ |
| <b>M43</b> | × | √ | √ | √ | √ | √ |
| <b>M44</b> | × | √ | √ | √ | √ | √ |
| <b>M45</b> | × | √ | √ | √ | √ | √ |
| <b>M46</b> | × | √ | √ | √ | √ | √ |
| <b>M47</b> | × | × | × | × | √ | × |
| <b>M48</b> | × | × | × | × | √ | √ |
| <b>M49</b> | × | √ | √ | √ | √ | √ |

---
